# Supplementary material for: Evaluating Limited-Duration DRd Treatment in Biochemical and Clinical Relapse of Multiple Myeloma: A Taiwan-Based Analysis
Source: Research Square preprint supplement (doi:10.21203/rs.3.rs-8580991/v1), 2026-01-20
Supplement: Supplementary file 1 [file afe7e3a7349257b72c2bcd77.xlsx]

## Sheet: Table 3
Table 3. DRd response evaluation in BP and CP
		DRd( n=56, %)
	Biochemical	Clinical	Overall
Overall response(PR+VGPR+CR)
Rate--%	1	0.829	0.893
Best overall response
Complete response	11(52.4%)	23(34.3%)	23(41.1%)
Very good partial response	6(28.6%)	5(14.3%)	11(19.6%)
Very good partial response or better	17(81%)	28(48.6%)	34(60.7%)
Partial response	4(19%)	12(34.3%)	16(28.6%)
Stable disease	0	1(2.9%)	1(1.8%)
Progressive disease	0	4(11.4%)	5(8.9%)
Table 3. Best overall response from the overall population with relapsed or refractory multiple myeloma according to International Myeloma Working Group(IMWG)
Abbreviations:
DRd = Daratumumab, Lenalidomide, dexamethasome
PR = Partial response, VGPR = Very good partial response, CR = Complete response
