# Supplementary material for: Evaluating Limited-Duration DRd Treatment in Biochemical and Clinical Relapse of Multiple Myeloma: A Taiwan-Based Analysis
Source: Research Square preprint supplement (doi:10.21203/rs.3.rs-8580991/v1), 2026-01-20
Supplement: Supplementary file 2 [file b31bca6e1b00a4d1420a84c6.xlsx]

## Sheet: Table 1
Table 1. Demographic and Clinical Characteristics at DRd for Patients With Multiple myeloma
Variable	N = 56
Sex - no. (%)
Men	32(57.1%)
Women	24 ( 42.9 % )
Median age (IQR), years	61.2±11
Type
IgG	25(44.6%)
IgA	21(37.5%)
Light chain	7(12.5%)
Others (non-secretory type)	3(5.4%)
ISS stage - no. (%)
Stage I	9(16.1%)
Stage II	20(35.7%)
Stage III	27(48.2%)
Light chain - no. (%)
Kappa	33(58.9%)
Lambda	23(41.1%)
Chromosome - no. (%)
Normal	53(94.6%)
Complex	3(5.4%)
Cytogenetics - no. (%)
Standard	41(73.2%)
High risk	15(26.8%)
TP 53 - no. (%)
Negative	27(48.2%)
Positive	10(17.9%)
Unknown	19(33.9%)
FISH - no. (%)
All negative	18(40%)
IGH/FGFR3	3(5.4%)
1q21.3(CKS1B)	3(5.4%)
TP53	8(14.3%)
TP 53, IGH/FGFR3, 1q21	1(1.8%)
TP53, 1q21.3(CKS1B)	1(1.8%)
Lab
White blood count	7084
Hemoglobin	9.97± 2.6(g/dL)
Platelet	192±70(K/uL)
LDH	184±76
Cr	1.74±2.3
Albumin	3.6±0.8
B2-microglobulin	7785
Previous therapy - no. (%)
Proteasome inhibitor	56(100%)
Thalidomide	50(89.3%)
Lenalidomide	13(23.2%)
Alkylating agent	37(66.1%)
ASCT	26(46.6%)
Refractory disease - (%)
To last line therapy	21(37.5%)
To Proteasome inhibitor only	16(28.6%)
To Lenalidomide only	7(12.5%)
To Valcade and lenalidomide	4(7.1%)
Line of Daratumumab - (%)
Second line	44(78.6%)
More than 2 line	12(21.4%)
Abbreviations: DRd = Daratumumab, Lenalidomide, dexamethasome ; ISS = International staging system
FISH = Fluorescence in situ hybridization ; ASCT = Autologous Stem Cell Transplant ; IQR = interquartile range
IGH = immunoglobulin heavy locus ; FGFR3 = Fibroblast growth factor receptor 3 (FGFR3)
