# Supplementary material for: Evaluating Limited-Duration DRd Treatment in Biochemical and Clinical Relapse of Multiple Myeloma: A Taiwan-Based Analysis
Source: Research Square preprint supplement (doi:10.21203/rs.3.rs-8580991/v1), 2026-01-20
Supplement: Supplementary file 3 [file c5a1aaf66bcc22ea8c1a4cc6.docx]

Supplementary


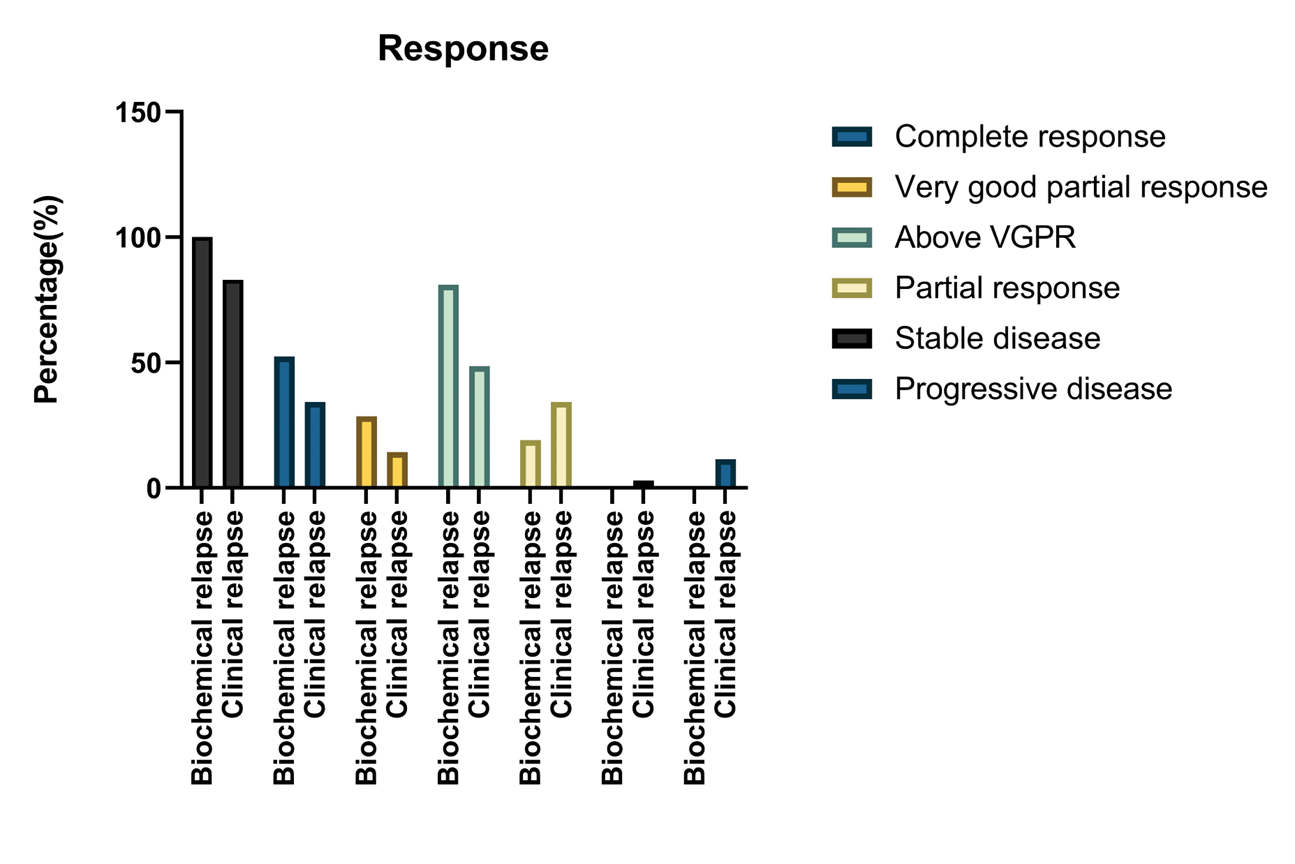


Supplementary 1

This figure illustrates the responses observed in biochemical relapse versus clinical relapse.


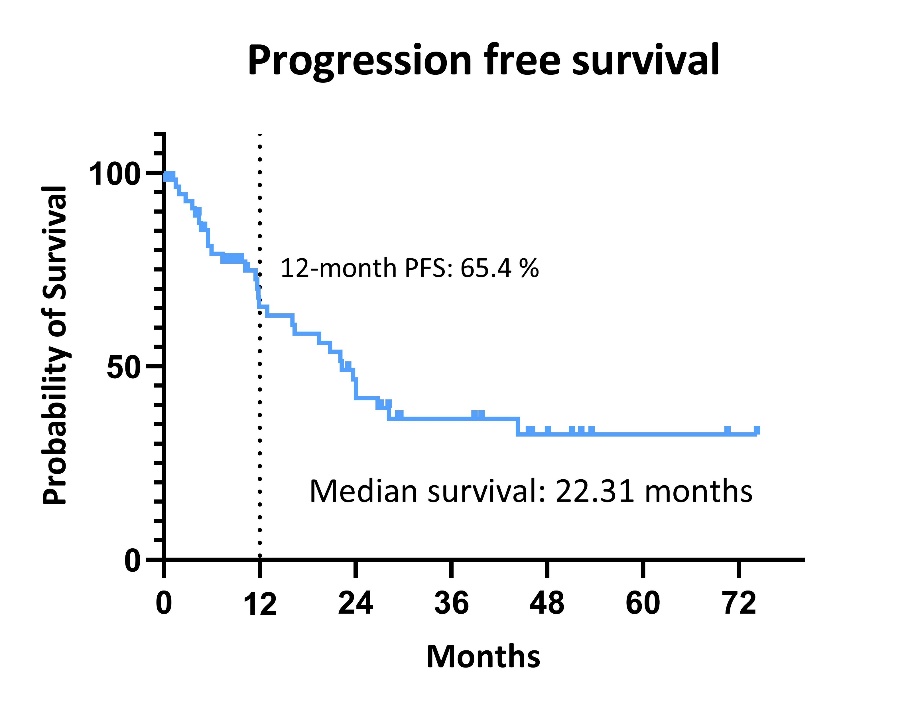


Supplementary 2(a)


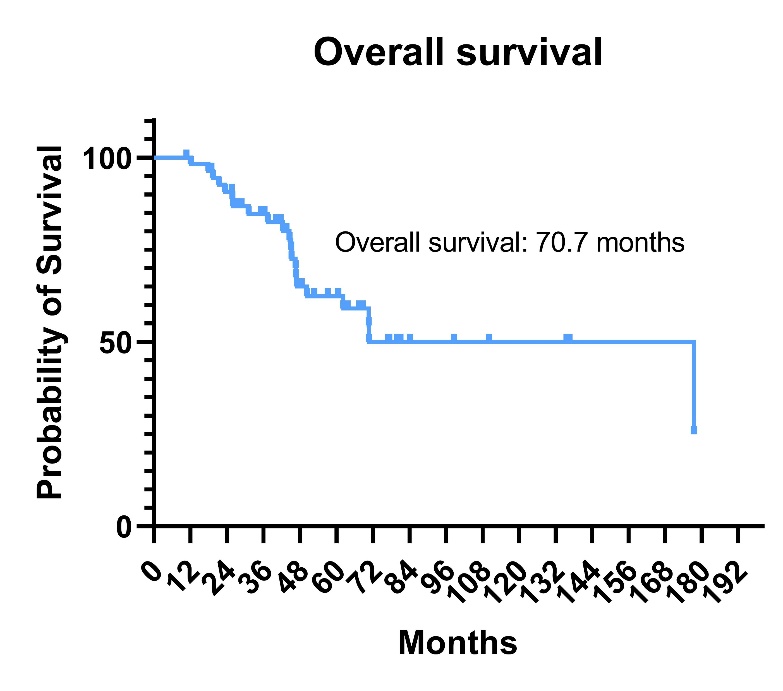


Supplementary 2(b)

Progression-free survival(2a) and overall survival(2b) for the overall population.


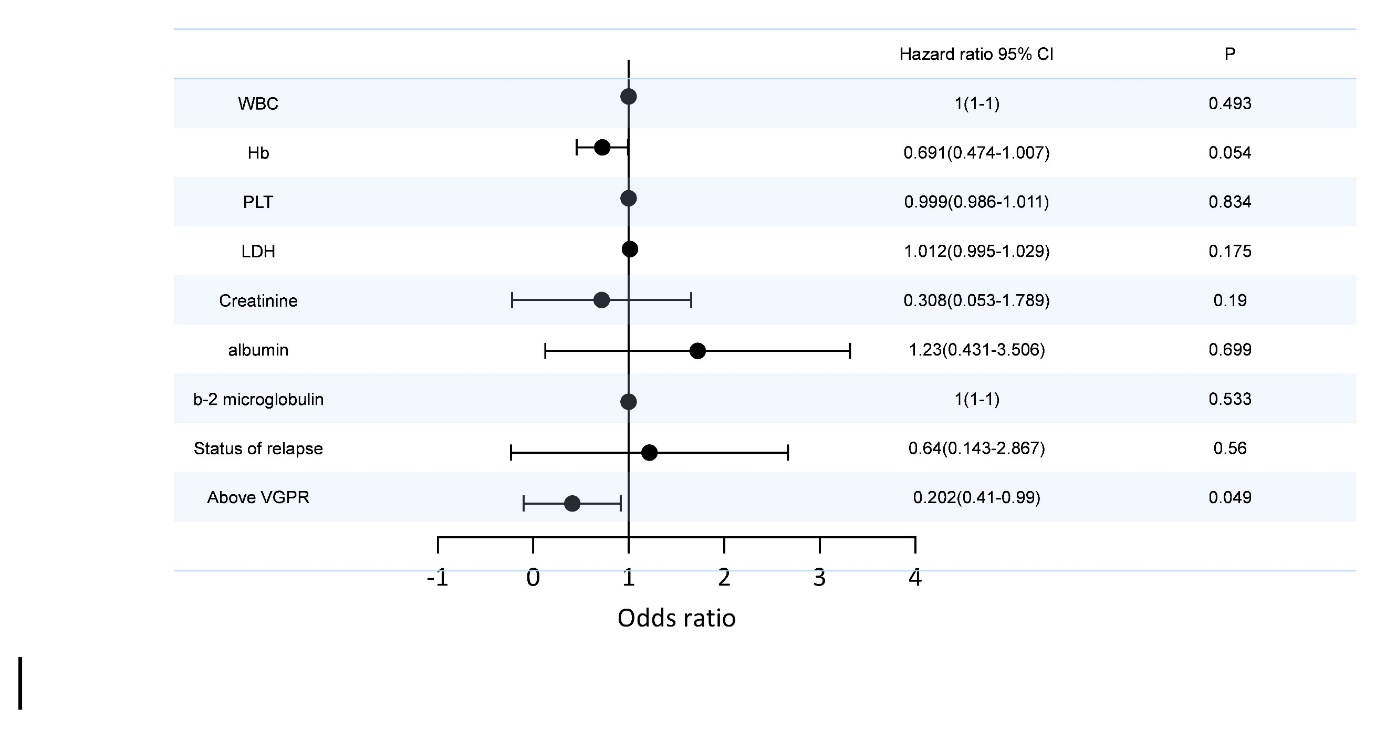


Supplementary 3

Forest plot assessing the association of maintenance therapy with lenalidomide and dexamethasone.
