# Supplementary material for: Evaluating Limited-Duration DRd Treatment in Biochemical and Clinical Relapse of Multiple Myeloma: A Taiwan-Based Analysis
Source: Research Square preprint supplement (doi:10.21203/rs.3.rs-8580991/v1), 2026-01-20
Supplement: Supplementary file 4 [file f2e1f6a1d63d2b882a76e8a8.xlsx]

## Sheet: Table 2
Table 2. Demographic and Clinical Characteristics at DRd for Patients With Multiple myeloma between CP and BP
Variable	Biochemical(N=21)	Clinical(N=35)	P value
Sex - no. (%)
Men	13 (38.1%)	19 (54.3%)
Women	8 (61.9%)	16 (45.7%)
Median age (IQR), years	57.9 ± 11	63.1 ±11	0.577
Time from Diagnosis to First relapse	37.2 ± 48 months	21.6 ±17 months	0.09
Type			0.187
IgG	7 (33.3%)	18 (51.4%)
IgA	11 (52.4%)	10 (28.6%)
Light chain	2 (9.5%)	5 (14.3%)
Others (non-secretory type)	1 (4.8%)	2 (5.7%)
ISS stage - no. (%)			0.216
Stage I	4 (19%)	5 (14.3%)
Stage II	10 (47.6%)	10 (28.6%)
Stage III	7 (33.3%)	20 (57.1%)
Light chain - no. (%)			0.058
Kappa	9 (42.9%)	24 (68.6 %)
Lambda	12 (57.1%)	11 (31.4%)
Chromosome - no. (%)			0.878
Normal	20 (95.2%)	33 (94.3%)
Complex	1(4.8%)	2 (5.7 %)
Cytogenetics - no. (%)			0.139
Standard	13 (61.9%)	28 (80%)
High risk	8 (38.1%)	7 (20%)
TP 53 - no. (%)			0.236
Negative	14 (82.4%)	13 ( 65% )
Positive	3 ( 17.6%)	7 ( 35% )
Unknown
Lab
White blood count	5923	7788	0.312
Hemoglobin	11 ± 2.3	9.2 ± 2.6	0.013**
Platelet	202 ± 58	185 ± 77	0.393
LDH	171 ±48	193±89	0.322
Cr	1.2 ± 0.7	2 ± 2.8	0.201
Albumin	3.5±0.8	3.6±0.8	0.567
B2-microglobulin	4006	10265	0.008**
Previous therapy - no. (%)
Proteasome inhibitor	21(100%)	35 (100%)
Thalidomide	19 (90.5%)	31 ( 88.6%)	0.823
Lenalidomide	5( 23.8%)	8 (22.9%)	0.935
Alkylating agent	15 (71.4%)	22 ( 62.9% )	0.512
ASCT	11 (52.4%)	15 (42.9%)	0.489
Refractory disease - (%)
To last line therapy	4 (19%)	17 (48.6%)	0.027**
To Proteasome inhibitor only	3 (14.3%)	13 (37.1%)	0.067
To Lenalidomide only	1 (4.8%)	6 (17.1%)	0.175
To Valcade and lenalidomide	1 (4.8%)	3 (8.6%)	0.592
Line of Daratumumab - (%)			0.336
Second line	17 (81%)	27 (77.1%)
More than 2 line	4 ( 19%)	8 (22.9%)
Abbreviations: DRd = Daratumumab, Lenalidomide, dexamethasome ; ISS = International staging system
FISH = Fluorescence in situ hybridization ; ASCT = Autologous Stem Cell Transplant ; IQR = interquartile range
IGH = immunoglobulin heavy locus ; FGFR3 = Fibroblast growth factor receptor 3 (FGFR3)
